# Supplementary material
Source: PubMed Central journal article supplement (PMC3552913)
Supplement: cc-11-4310-s01.pdf [file cc-11-4310-s01.pdf]

## **Supplemental Material to:**

**Qiongyi Zhang, Muhammad Khairul Ramlee,  
Reinhard Brunmeir, Claudio J. Villanueva,  
Daniel Halperin and Feng Xu**

**Dynamic and distinct histone modifications modulate the  
expression of key adipogenesis regulatory genes**

**Cell Cycle 2012; 11(23)**

**<http://dx.doi.org/10.4161/cc.22224>**

**<http://www.landesbioscience.com/journals/cc/article/22224>**

## Gene Expression

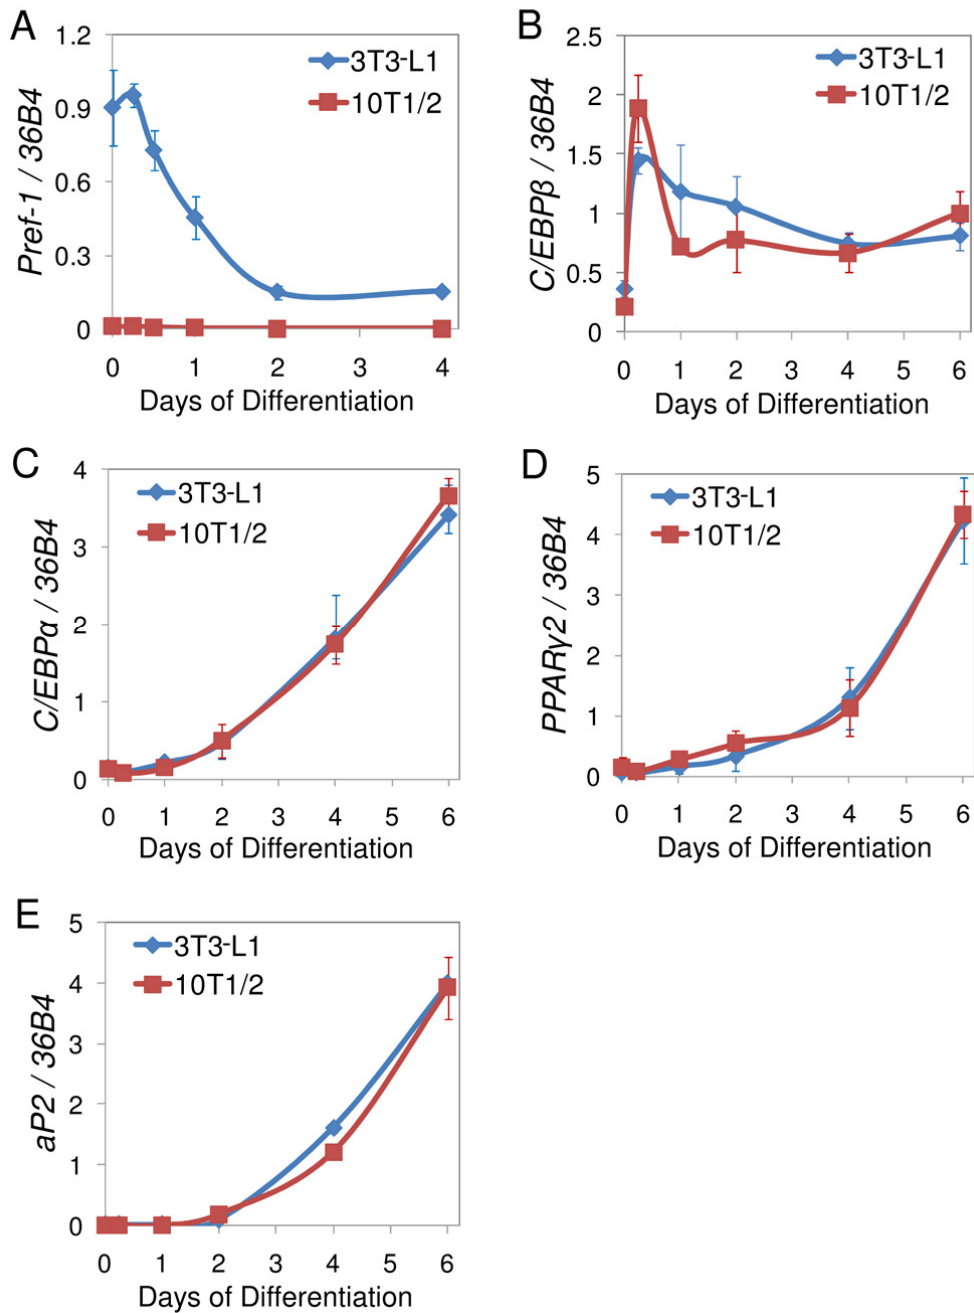

**Figure S1. Expression of adipogenic regulatory genes during adipogenesis.**

The mRNA levels of five key adipogenic regulatory genes were measured by RT-qPCR at the indicated time points during adipogenesis of 3T3-L1 preadipocytes and C3H 10T1/2 mesenchymal stem cells. The data shown here are the normalized mRNA levels

of the (A) *Pref-1*, (B) *C/EBP $\beta$* , (C) *C/EBP $\alpha$* , (D) *PPAR $\gamma$ 2* and (E) *aP2* genes. Gene *36B4* was used as an internal control for all gene expression analyses in this study. These results are the averages of three independent RT-qPCR assays, and the error bars indicate standard deviations.

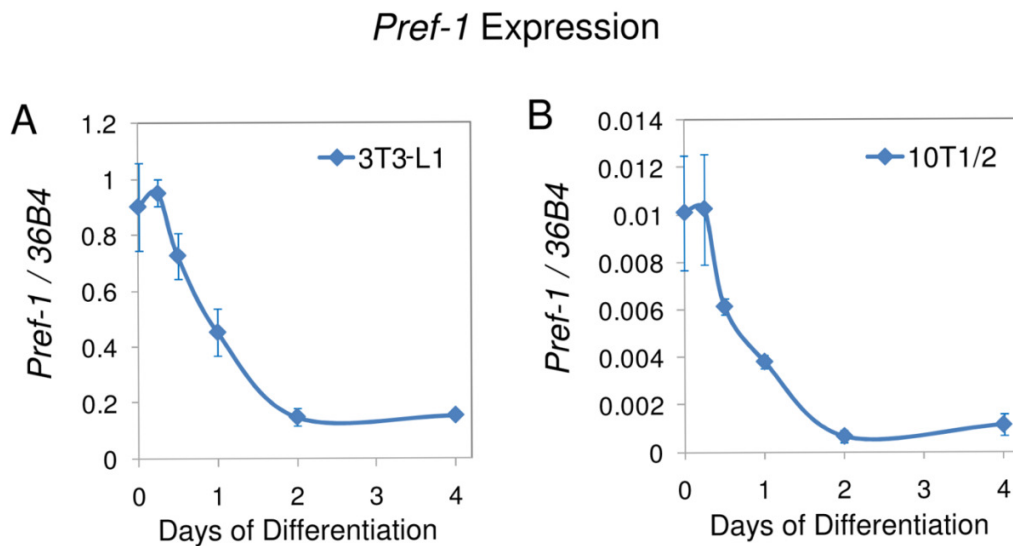

**Figure S2. *Pref-1* gene expression is repressed during adipogenesis.**

*Pref-1* mRNA levels were determined by RT-qPCR at the indicated time points during the adipogenic differentiation of (A) 3T3-L1 preadipocytes and (B) C3H 10T1/2 mesenchymal stem cells and then normalized to *36B4* levels. These results are the averages of three independent RT-qPCRs, and the error bars indicate standard deviations.

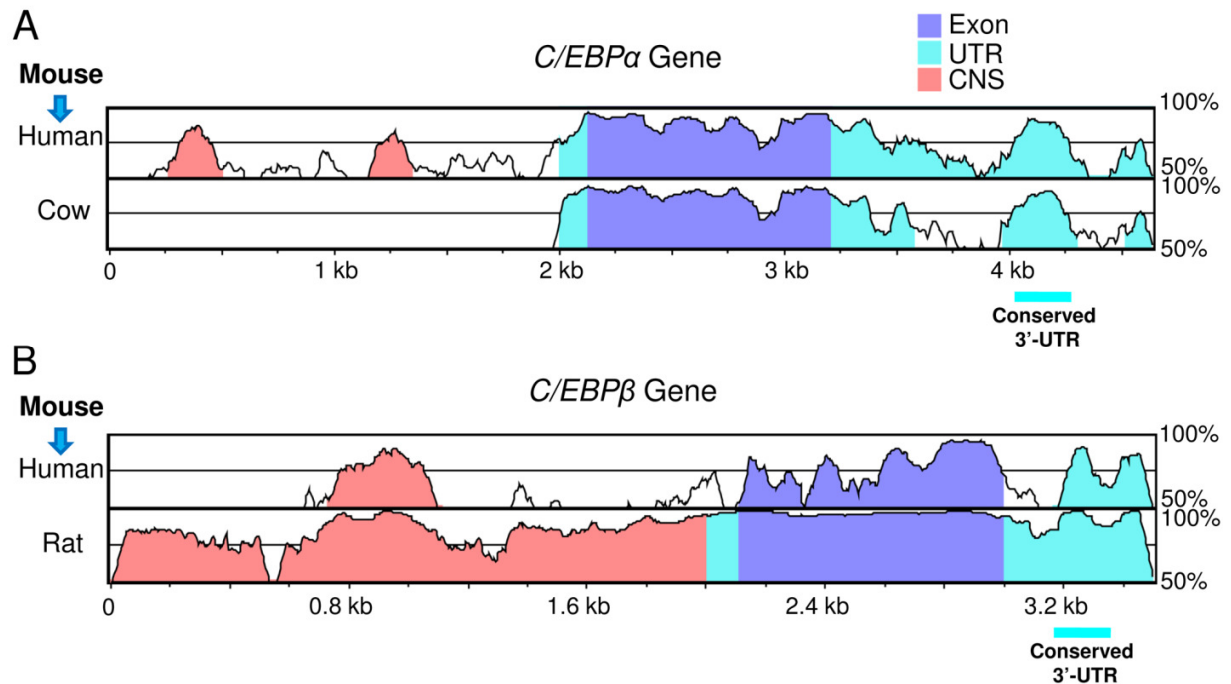

**Figure S3. Sequence conservation analysis of the mouse adipogenic genes *C/EBP $\alpha$*  and *C/EBP $\beta$* .**

Mouse **(A)** *C/EBP $\alpha$*  and **(B)** *C/EBP $\beta$*  genomic sequences were compared to human and cow or human and rat sequences, respectively, using the VISTA algorithm. The highly conserved 3'-UTR sequence for each gene is highlighted by a light blue bar under the graph. (CNS: conserved non-coding sequence)

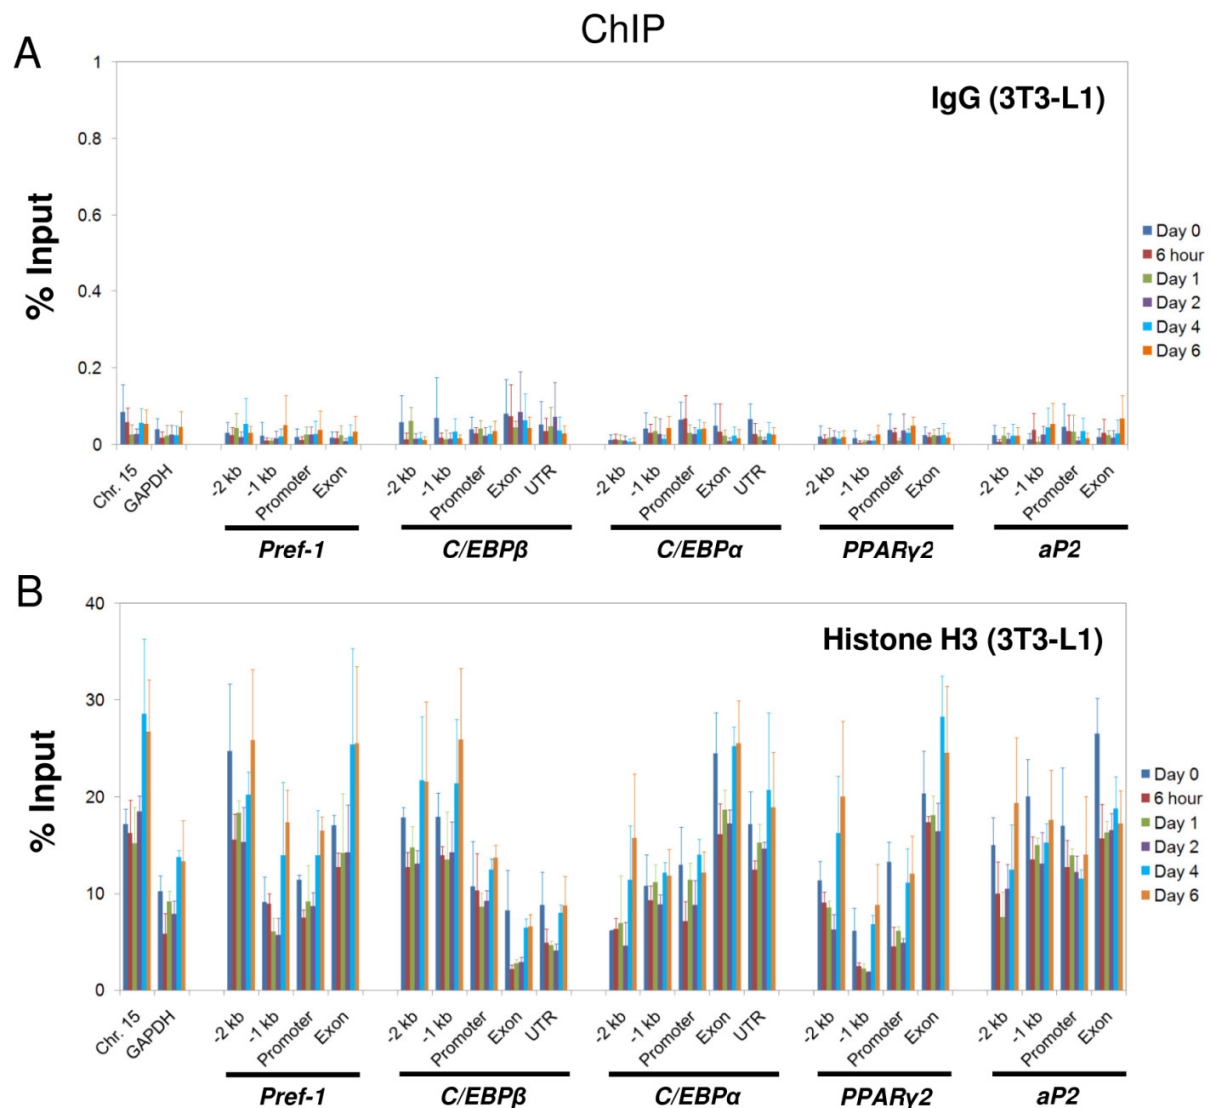

**Figure S4. Histone H3 occupancy at the genomic loci of key adipogenic regulators during 3T3-L1 adipogenesis.**

**(A)** Rabbit IgG was used as a negative control for the ChIP assay. **(B)** Histone H3 occupancy was examined by ChIP analysis using an antibody against the histone H3 C-terminus at the genomic loci of key adipogenic regulators, including Pref-1, C/EBP $\beta$ , C/EBP $\alpha$ , PPAR $\gamma$ 2 and aP2. The primers used in this study are described in Figure 2. ChIP samples were collected at the indicated time points. These results are the averages of three independent ChIP-qPCRs, and the error bars indicate standard deviations.

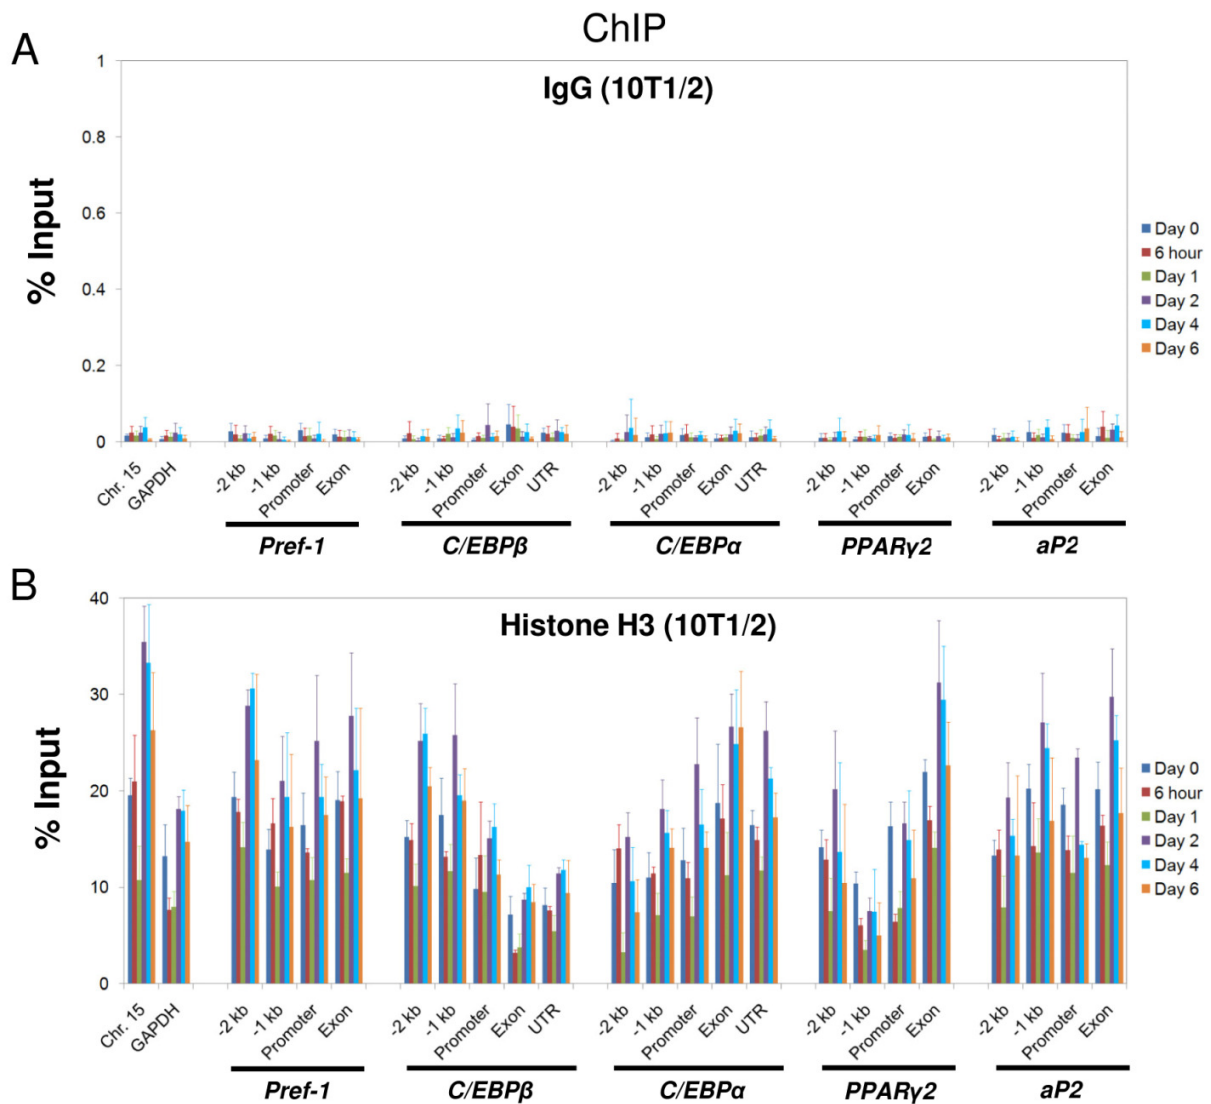

**Figure S5. Histone H3 occupancy at the genomic loci of key adipogenic regulators during C3H 10T1/2 adipogenesis.**

**(A)** Rabbit IgG was used as a negative control for the ChIP assay. **(B)** Histone H3 occupancy was examined by ChIP analysis using an antibody against the histone H3 C-terminus at the genomic loci of key adipogenic regulators, including *Pref-1*, *C/EBPβ*, *C/EBPα*, *PPARγ2* and *aP2*. The primers used in this study are described in Figure 2. ChIP samples were collected at the indicated time points. These results are the averages of three independent ChIP-qPCRs, and the error bars indicate standard deviations.

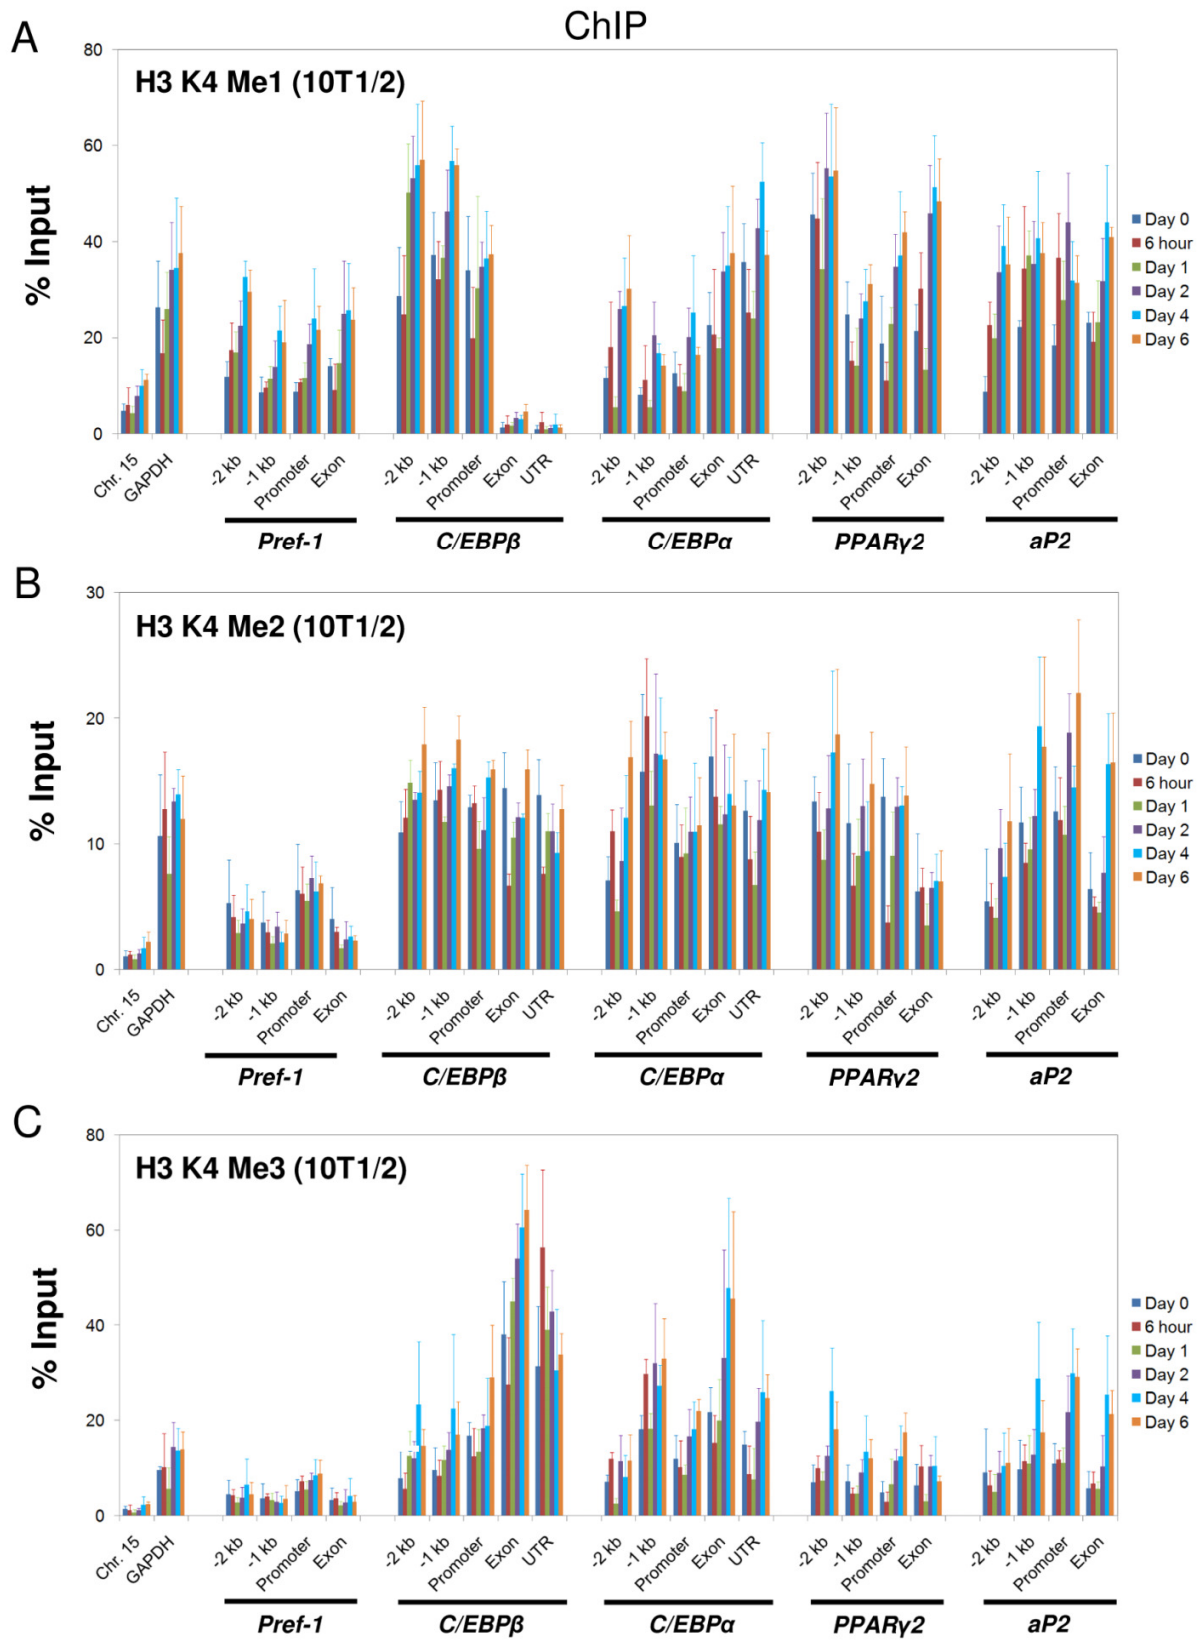

**Figure S6. Histone H3 K4 methylation states at the genomic loci of key adipogenic regulators during C3H 10T1/2 adipogenesis.**

Levels of histone H3 K4 **(A)** mono-methylation, **(B)** di-methylation and **(C)** tri-methylation at the genomic loci of key adipogenic regulators, including Pref-1, C/EBP $\beta$ , C/EBP $\alpha$ , PPAR $\gamma$ 2 and aP2, were examined by ChIP analysis using specific antibodies. The primers used in this study are described in Figure 2. ChIP samples were collected at the indicated time points. These results are the averages of three independent ChIP-qPCRs, and the error bars indicate standard deviations.



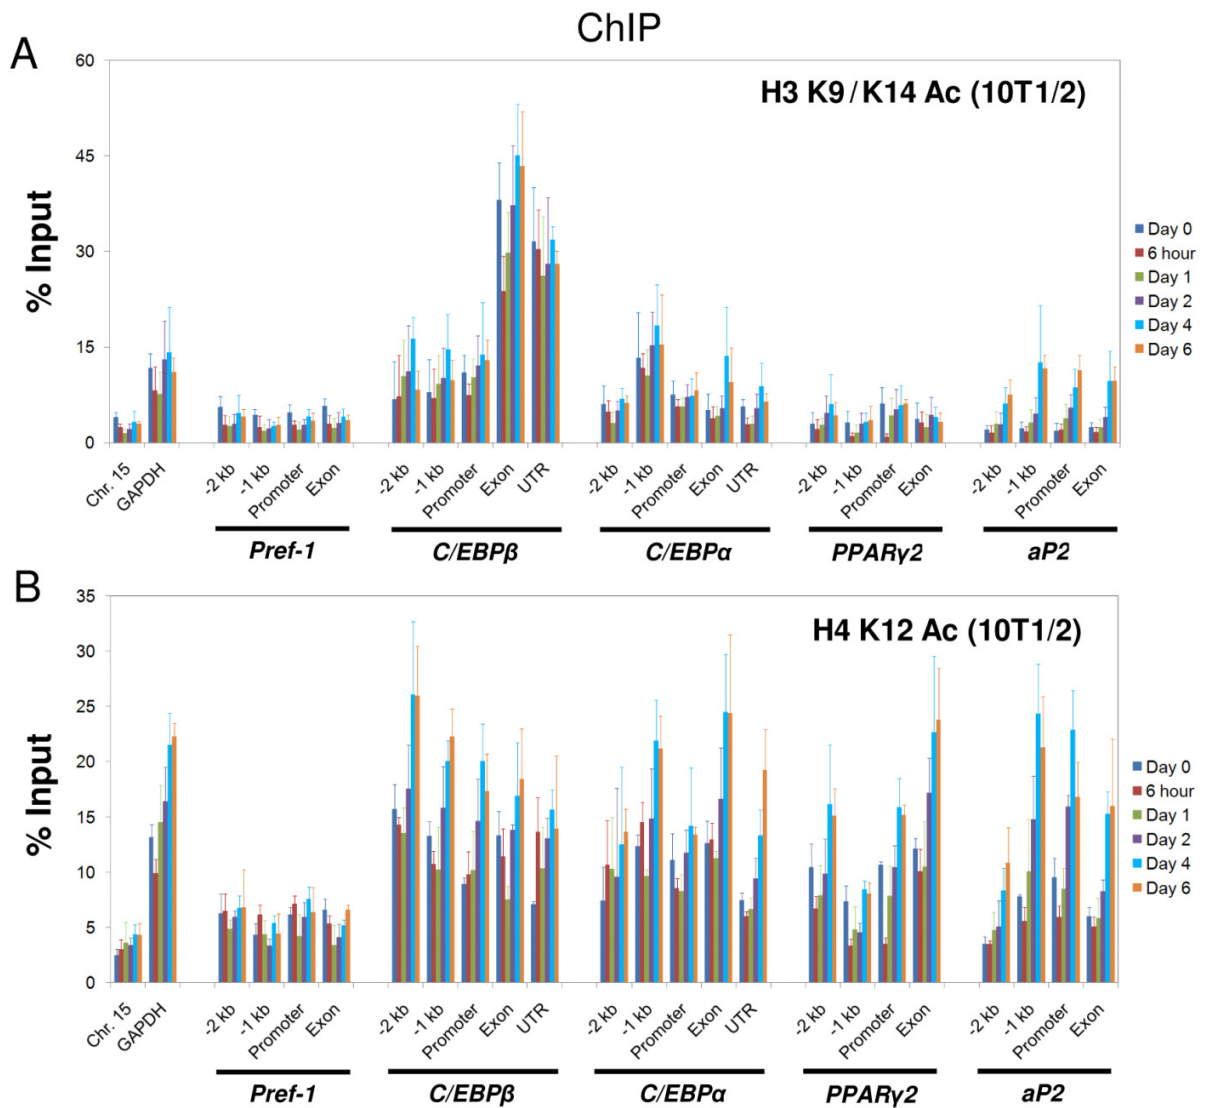

**Figure S7. Histone H3 and H4 tails show distinct patterns of acetylation at key adipogenic regulator genes in C3H 10T1/2 cells.**

Levels of histone **(A)** H3 K9/K14 acetylation and **(B)** H4 K12 acetylation at the genomic loci of key adipogenic regulators, including Pref-1, C/EBPβ, C/EBPα, PPARγ2 and aP2, were examined by ChIP analysis using specific antibodies. The primers used in this study are described in Figure 2. ChIP samples were collected at the indicated time points. These results are the averages of three independent ChIP-qPCRs, and the error bars indicate standard deviations.

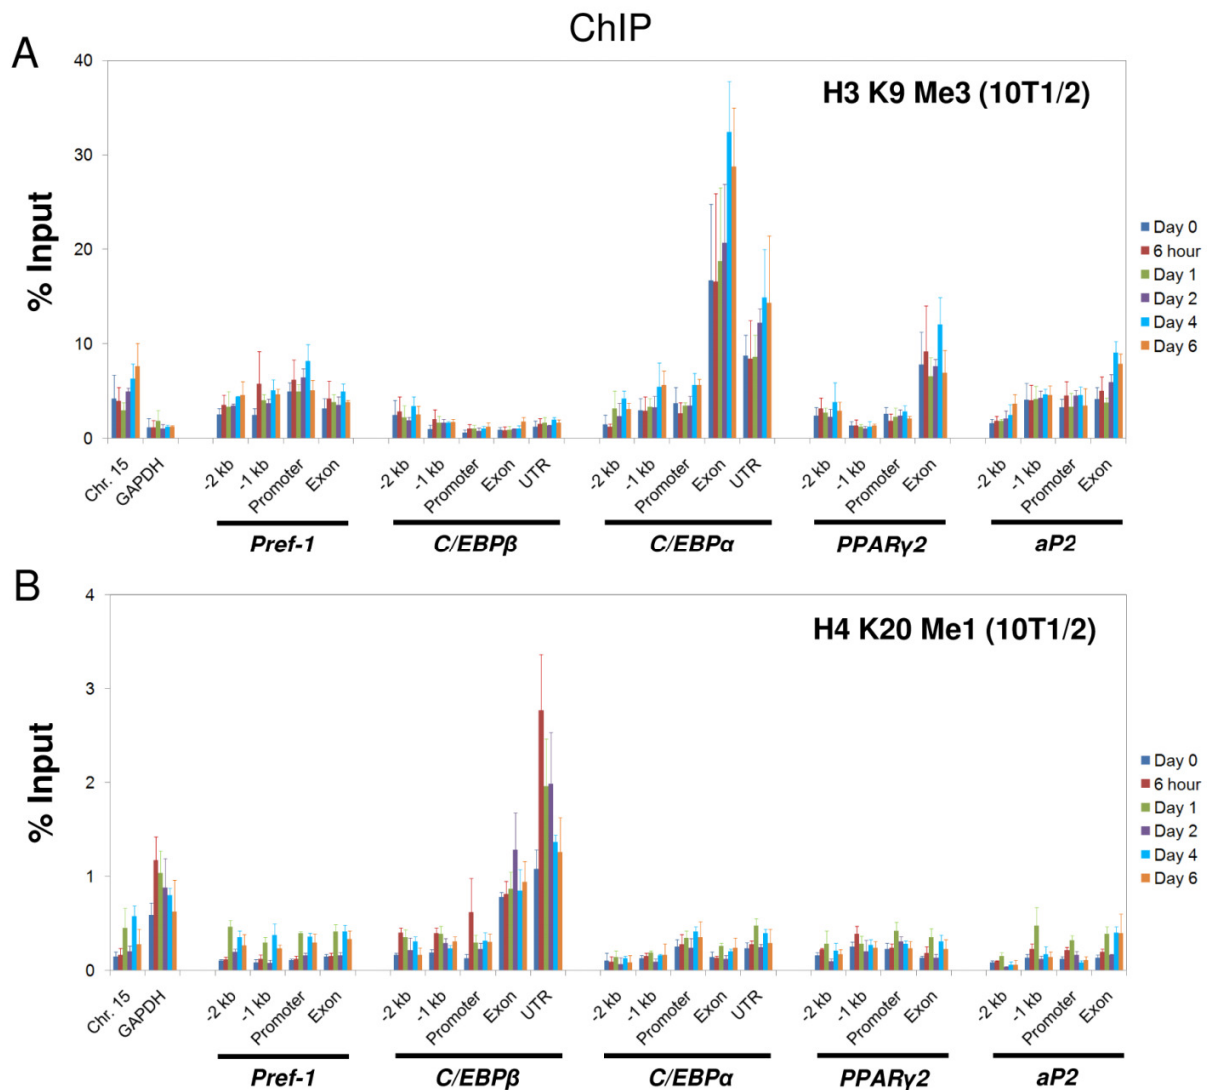

**Figure S8. Patterns of histone H3 K9 tri-methylation and H4 K20 mono-methylation at key adipogenic regulator genes in C3H 10T1/2 cells.**

Levels of histone **(A)** H3 K9 tri-methylation and **(B)** H4 K20 mono-methylation at the genomic loci of key adipogenic regulators, including Pref-1, C/EBPβ, C/EBPα, PPARγ2 and aP2, were examined by ChIP analysis using specific antibodies. The primers used in this study are described in Figure 2. ChIP samples were collected at the indicated time points. These results are the averages of three independent ChIP-qPCRs, and the error bars indicate standard deviations.

**Table S1.** Primers for RT-qPCR.

| <b>Primer</b>     | <b>Sequences (5' - 3')</b> | <b>References</b> |
|-------------------|----------------------------|-------------------|
| 36B4-F            | AGATGCAGCAGATCCGCAT        | (1)               |
| 36B4-R            | GTTCTTGCCCATCAGCACC        |                   |
| Pref1-F           | CGTGATCAATGGTTCTCCCT       | (2)               |
| Pref1-R           | AGGGGTACAGCTGTTGGTTG       |                   |
| C/EBP $\beta$ -F  | AAGAGCCGCGACAAGGC          | (1)               |
| C/EBP $\beta$ -R  | GTCAGCTCCAGCACCTTGTG       |                   |
| C/EBP $\alpha$ -F | GCGGGCAAAGCCAAGAA          | (1)               |
| C/EBP $\alpha$ -R | GCGTTCCCGCCGTACC           |                   |
| PPAR $\gamma$ 2-F | AACTCTGGGAGATTCTCCTGTTGA   | (1)               |
| PPAR $\gamma$ 2-R | TGGTAATTTCTTGTGAAGTGCTCATA |                   |
| aP2-F             | CACCGCAGACGACAGGAAG        | (1)               |
| aP2-R             | GCACCTGCACCAGGGC           |                   |
| EZH2-F            | AGCACAAGTCATCCCGTTAAAG     | (3)               |
| EZH2-R            | AATTCTGTTGTAAGGGCGACC      |                   |

**Table S2.** Primers for ChIP-qPCR.

| <b>Primer</b>            | <b>Sequences (5' - 3')</b> | <b>Product Size</b> | <b>References</b> |
|--------------------------|----------------------------|---------------------|-------------------|
| Chr.15-F                 | AGCGTGGCCTTGGCAGCAAA       | 138 bp              | This study        |
| Chr.15-R                 | TGCGATTGGCTTCCTCTCCCC      |                     |                   |
| GAPDH-F                  | TCCAGCTGGGTGCCGGAAGT       | 106 bp              | This study        |
| GAPDH-R                  | TCAAGCCCCACCCTCCGCAT       |                     |                   |
| Pref-1 -2kb-F            | TCCCCTGCTTTCTGCCCGAGA      | 113 bp              | This study        |
| Pref-1 -2kb-R            | TCAGCCCAAAGAGGGGAGAGCA     |                     |                   |
| Pref-1 -1kb-F            | TGGGCATACGTGTTGCTGCG       | 91 bp               | This study        |
| Pref-1 -1kb-R            | CCACAGTCACAGTCTGGGCCT      |                     |                   |
| Pref-1 Promoter-F        | CATGTGTGCGCGGGACTCCA       | 125 bp              | This study        |
| Pref-1 Promoter-R        | CAGGCCCGCTTAGCGCAAGT       |                     |                   |
| Pref-1 Exon-F            | TCTGCACCGACATCGGGGGT       | 136 bp              | This study        |
| Pref-1 Exon-R            | ACCTGGGTGTGCTGGAGGCA       |                     |                   |
| C/EBP $\beta$ -2kb-F     | TTGCTGTGTCTCCCCAGAACCC     | 153 bp              | This study        |
| C/EBP $\beta$ -2kb-R     | GCTTGGTAGTAACTACCTTAAACC   |                     |                   |
| C/EBP $\beta$ -1kb-F     | CAGCTCAGCAGATAACACCGAAG    | 141 bp              | This study        |
| C/EBP $\beta$ -1kb-R     | ACCCTTCTGCCACTCCTAGGTG     |                     |                   |
| C/EBP $\beta$ Promoter-F | TGGGAGGACATGCACCCCGT       | 133 bp              | This study        |
| C/EBP $\beta$ Promoter-R | GCTGTCCCGGACCCCAACT        |                     |                   |
| C/EBP $\beta$ Exon-F     | ACGAGCGCGCCATCGACTTC       | 152 bp              | This study        |
| C/EBP $\beta$ Exon-R     | ACCGTAGTCGGCCGGCTTCT       |                     |                   |
| C/EBP $\beta$ UTR-F      | TGCACAGCGCACCGGGTTTC       | 62 bp               | This study        |
| C/EBP $\beta$ UTR-R      | ACACGCGCTCAGCCACGTTT       |                     |                   |
| C/EBP $\alpha$ -2kb-F    | GAGAGCGATCCTCTGCTCACACC    | 198 bp              | This study        |
| C/EBP $\alpha$ -2kb-R    | CCGACTTCGTCTGAAGGACGCATC   |                     |                   |
| C/EBP $\alpha$ -1kb-F    | ACTAGAGTGCTCCACGCTGG       | 140 bp              | This study        |
| C/EBP $\alpha$ -1kb-R    | TAACCCCGGAGCCTGGTG         |                     |                   |

|                            |                           |        |            |
|----------------------------|---------------------------|--------|------------|
| C/EBP $\alpha$ Promoter-F  | ATCCGGGTGGGAGACAGGCC      | 142 bp | This study |
| C/EBP $\alpha$ Promoter-R  | CACTAGGGAGCCCGGGAGCA      |        |            |
| C/EBP $\alpha$ Exon-F      | CGCTGGTGATCAAACAAGAGCC    | 160 bp | This study |
| C/EBP $\alpha$ Exon-R      | TGCGCGATCTGGAAGTCAAG      |        |            |
| C/EBP $\alpha$ UTR-F       | GCCAGCCGCTGTTGCTGAAG      | 140 bp | This study |
| C/EBP $\alpha$ UTR-R       | AGGCACCGCTGGGACACAGA      |        |            |
| PPAR $\gamma$ 2 -2kb-F     | CAAGCAAAGCTCTACCACAAAGC   | 139 bp | This study |
| PPAR $\gamma$ 2 -2kb-R     | GAATGTAAACTTCAGCTTCACTTCC |        |            |
| PPAR $\gamma$ 2 -1kb-F     | TTATTGCCATCTGATACTGCCC    | 154 bp | This study |
| PPAR $\gamma$ 2 -1kb-R     | TAAGGCCTTTGCCCTTTTGGCAG   |        |            |
| PPAR $\gamma$ 2 Promoter-F | TGTGTGGGTCCTGGCGAGACA     | 130 bp | This study |
| PPAR $\gamma$ 2 Promoter-R | TGGCTGGCACTGTCCTGACTGA    |        |            |
| PPAR $\gamma$ 2 Exon-F     | CAGAGCAAAG AGGTGGCCATCCG  | 159 bp | This study |
| PPAR $\gamma$ 2 Exon-R     | GATCTCATGGACACCATACTTGAG  |        |            |
| aP2 -2kb-F                 | TCTTGTTATATTAGCCACCTGTCTG | 69 bp  | *          |
| aP2 -2kb-R                 | GCCAGCCCATGTAAACTTCT      |        |            |
| aP2 -1kb-F                 | CAGCTAGGTTTCTTTGAGTTAGAG  | 123 bp | This study |
| aP2 -1kb-R                 | TGTTTGGTTTGGGTTGGGTTTTGG  |        |            |
| aP2 Promoter-F             | CTGGTCATGAAGGAAATGATCTGG  | 120 bp | This study |
| aP2 Promoter-R             | GCTGCAGCACAGGAGGGTGCTATG  |        |            |
| aP2 Exon-F                 | AAGTGGCAGGCATGGCCAAGC     | 150 bp | This study |
| aP2 Exon-R                 | TCACCTTCTGTCGTCTGCGGT     |        |            |

\* Villanueva, C. and Tontonoz, P. *Personal communication*.

**Table S3.** Primers for plasmid construction.

| <b>Primer</b>        | <b>Sequences (5' - 3')</b>                     | <b>References</b> |
|----------------------|------------------------------------------------|-------------------|
| pGL3 linker-F        | GATCCGACGTCACCGGTGGGCCCGCGCGC<br>ATGCATACTAGTG | This study        |
| pGL3 linker-R        | TCGACACTAGTATGCATGCGCGCGGGCCCA<br>CCGGTGACGTCG |                   |
| C/EBP $\beta$ P3kb-F | TTTTTTGGTACCAGCAACCATCACAGCCACAGCTA            | This study        |
| C/EBP $\beta$ P3kb-R | TTTTTTTTCTCGAGTGCGTACGCTGGGGCCCCT              |                   |
| C/EBP $\beta$ UTR-F  | AAAAGACGTCCCTGCACAGCGCACCGGGTT                 | This study        |
| C/EBP $\beta$ UTR-R  | AAAAGTCGACGGCTTTTAAACATTCTCCAAAAAAG            |                   |

## Supplemental References

1. Waki, H., Park, K.W., Mitro, N., Pei, L., Damoiseaux, R., Wilpitz, D.C., Reue, K., Saez, E. and Tontonoz, P. (2007) The small molecule harmine is an antidiabetic cell-type-specific regulator of PPAR $\gamma$  expression. *Cell Metab*, **5**, 357-370.
2. Han, J., Farmer, S.R., Kirkland, J.L., Corkey, B.E., Yoon, R., Pirtskhalava, T., Ido, Y. and Guo, W. (2002) Octanoate attenuates adipogenesis in 3T3-L1 preadipocytes. *J Nutr*, **132**, 904-910.
3. Wang, X., Spandidos, A., Wang, H. and Seed, B. (2012) PrimerBank: a PCR primer database for quantitative gene expression analysis, 2012 update. *Nucleic Acids Res*, **40**, D1144-1149.
